# Supplementary material for: Evaluation of the Small Heat Shock Protein Family Members HSPB2 and HSPB3 in Bladder Cancer Prognosis and Progression
Source: MDPI journal article supplement (doi:10.3390/ijms24032609), 2023-01-30
Supplement: s1 [file s1]

**Supplemental Table S1.** Cox regression analysis for MIBC (T2-T4) patients' overall survival (OS) following treatment.

|                                  | <b>MIBC (T2-T4) overall survival (OS)</b>                 |                           |                            |                                         |                                      |
|----------------------------------|-----------------------------------------------------------|---------------------------|----------------------------|-----------------------------------------|--------------------------------------|
|                                  | <b>Univariate analysis</b>                                |                           |                            |                                         |                                      |
| <b>Covariant</b>                 | <b>HR<sup>a</sup></b>                                     | <b>95% CI<sup>b</sup></b> | <b>p-value<sup>c</sup></b> | <b>Bootstrap BCa 95% CI<sup>d</sup></b> | <b>Bootstrap p-value<sup>c</sup></b> |
| <b>HSPB2</b>                     |                                                           |                           |                            |                                         |                                      |
| Low expression                   | 1.00                                                      |                           |                            |                                         |                                      |
| High expression                  | 1.698                                                     | 0.539-5.353               | 0.366                      | 0.499-6.508                             | 0.339                                |
| <b>HSPB3</b>                     |                                                           |                           |                            |                                         |                                      |
| Low expression                   | 1.00                                                      |                           |                            |                                         |                                      |
| High expression                  | 1.131                                                     | 0.365-3.507               | 0.832                      | 0.313-3.955                             | 0.831                                |
| <b>Tumor Stage</b>               |                                                           |                           |                            |                                         |                                      |
| T2                               | 1.00                                                      |                           |                            |                                         |                                      |
| T3-T4                            | 7.066                                                     | 1.532-32.58               | 0.012                      | 2.136-103.4                             | 0.007                                |
| <b>Age (Continuous variable)</b> | 1.005                                                     | 0.954-1.058               | 0.849                      | 0.956-1.063                             | 0.811                                |
|                                  | <b>Multivariate analysis for <i>HSPB2</i><sup>e</sup></b> |                           |                            |                                         |                                      |
| <b>Covariant</b>                 | <b>HR<sup>a</sup></b>                                     | <b>95% CI<sup>b</sup></b> | <b>p-value<sup>c</sup></b> | <b>Bootstrap BCa 95% CI<sup>d</sup></b> | <b>Bootstrap p-value<sup>c</sup></b> |
| <b>HSPB2</b>                     |                                                           |                           |                            |                                         |                                      |
| Low expression                   | 1.00                                                      |                           |                            |                                         |                                      |
| High expression                  | 1.193                                                     | 0.359-3.966               | 0.774                      | 0.315-7.404                             | 0.778                                |
| <b>Tumor Stage</b>               |                                                           |                           |                            |                                         |                                      |
| T2                               | 1.00                                                      |                           |                            |                                         |                                      |
| T3-T4                            | 8.744                                                     | 1.728-44.26               | 0.009                      | 2.651-9.45x10 <sup>5</sup>              | 0.003                                |
| <b>Age (Continuous variable)</b> | 1.032                                                     | 0.958-1.112               | 0.406                      | 0.948-1.164                             | 0.493                                |
|                                  | <b>Multivariate analysis for <i>HSPB3</i><sup>e</sup></b> |                           |                            |                                         |                                      |
| <b>HSPB3</b>                     |                                                           |                           |                            |                                         |                                      |
| Low expression                   | 1.00                                                      |                           |                            |                                         |                                      |
| High expression                  | 1.167                                                     | 0.372-3.666               | 0.791                      | 0.265-7.645                             | 0.792                                |
| <b>Tumor Stage</b>               |                                                           |                           |                            |                                         |                                      |
| T2                               | 1.00                                                      |                           |                            |                                         |                                      |
| T3-T4                            | 9.076                                                     | 1.804-45.65               | 0.007                      | 2.776-1.43x10 <sup>6</sup>              | 0.004                                |

|                                  |       |             |       |             |       |
|----------------------------------|-------|-------------|-------|-------------|-------|
| <b>Age</b> (Continuous variable) | 1.031 | 0.957-1.110 | 0.423 | 0.934-1.188 | 0.508 |
|----------------------------------|-------|-------------|-------|-------------|-------|

<sup>a</sup> Hazard Ratio

<sup>b</sup> 95% confidence interval of the estimated HR

<sup>c</sup> Calculated by test for trend. Bootstrap *p*-value is based on 1000 bootstrap samples

<sup>d</sup> Bootstrap 95% confidence interval of the estimated HR based on 1000 bootstrap samples

<sup>e</sup> Multivariate analysis adjusted for tumor stage and patients' age
