# Supplementary figures and images for: Evaluation of the Small Heat Shock Protein Family Members HSPB2 and HSPB3 in Bladder Cancer Prognosis and Progression
Source: MDPI journal article supplement (doi:10.3390/ijms24032609), 2023-01-30

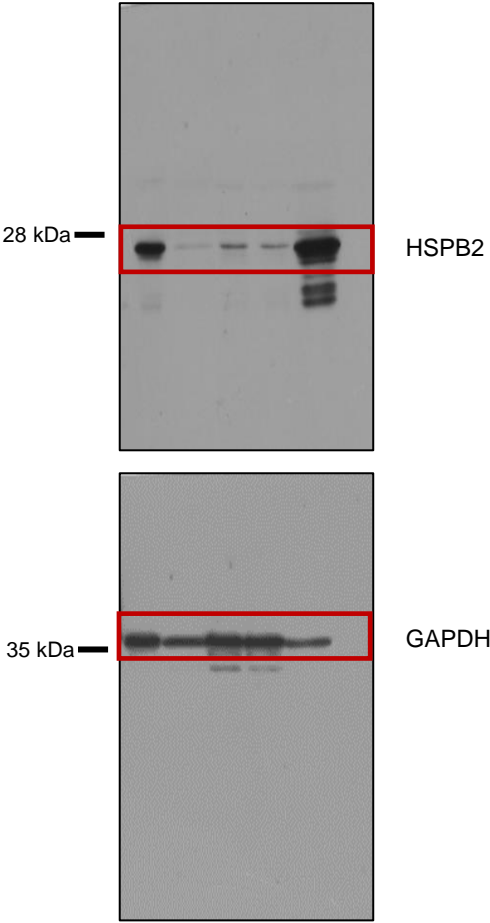

**Figure S1**

Supplement: s1 [file s1]
